# Supplementary material for: A P-Glycoprotein Is Linked to Resistance to the Bacillus thuringiensis Cry3Aa Toxin in a Leaf Beetle
Source: MDPI journal article supplement (doi:10.3390/toxins8120362), 2016-12-05
Supplement: s1 [file s1]

# A P-Glycoprotein Is Linked to Resistance to the *Bacillus thuringiensis* Cry3Aa Toxin in a Leaf Beetle

Yannick Pauchet, Anne Bretschneider, Sylvie Augustin and David G. Heckel

**Table S1.** Primers used in this study and their function.

| Primer Name     | Sequence (5'–3')                               | Function                       |
|-----------------|------------------------------------------------|--------------------------------|
| CTR_ABCB1_del_F | <u>TG</u> TAAAACGACGGCCAGTAAAGACCTCGACCTCACCTG | Genotyping                     |
| CTR_ABCB1_del_R | <u>CAGGAAACAGCTATGACCGAAGTGGCTTCGTCCAAGAG</u>  | Genotyping                     |
| M13_F           | TGTA <u>AAAACGACGGCCAGT</u>                    | Genotyping/<br>sequencing      |
| M13_R           | CAGGAAACAGCTATGACC                             | Genotyping/<br>sequencing      |
| CTR_ABCB1_F     | ACCATGGGGAAACGTGAAAAATATTC                     | Cloning pIB/<br>V5-His TOPO/TA |
| CTR_ABCB1_R     | AGTTGTCTGTCTTTGCAACTTAT                        | Cloning pIB/<br>V5-His TOPO/TA |

The M13 “tails” of the primers used for the genotyping are underlined. The Kozak sequence introduced on the forward primer used to amplify *CtABCB1* for cloning in the expression vector is indicated in bold/italic.

|                  |                                                                              |      |      |      |      |      |      |
|------------------|------------------------------------------------------------------------------|------|------|------|------|------|------|
|                  | 10                                                                           | 20   | 30   | 40   | 50   | 60   | 70   |
| CTR_ABC-B1_S.seq | ATGGGGAAACGTGAAAAATATTCATTGGATAAAAAAATAAGAGCCCATTAGACGTGCAATTCTACTAAAAATGAA  |      |      |      |      |      |      |
| CTR_ABC-B1_R.seq | ATGGGGAAACGTGAAAAATATTCATTGGATAAAAAAATAAGAGCCCATTAGACGTGCAATTCTACTAAAAATGAA  |      |      |      |      |      |      |
|                  | 80                                                                           | 90   | 100  | 110  | 120  | 130  | 140  |
| CTR_ABC-B1_S.seq | GAAAAAGAAGGAGATAAGACCAAACAAGTATCTTTTTTCAAATGTTTCAGGTATGCCACAGGATTCGACAAGCTC  |      |      |      |      |      |      |
| CTR_ABC-B1_R.seq | GAAAAAGAAGGAGATAAGACCAAACAAGTATCTTTTTTCAAATGTTTCAGGTATGCCACAGGATTCGACAAGCTC  |      |      |      |      |      |      |
|                  | 160                                                                          | 170  | 180  | 190  | 200  | 210  | 220  |
| CTR_ABC-B1_S.seq | CTATTGTCCATAGGCATCATTTCCGCAGTCGGAACAGGAGTGCTGCAGCCTATGAACACGATTCTGTTTCGGAAC  |      |      |      |      |      |      |
| CTR_ABC-B1_R.seq | CTATTGTCCATAGGCATCATTTCCGCAGTCGGAACAGGAGTGCTGCAGCCTATGAACACGATTCTGTTTCGGAAC  |      |      |      |      |      |      |
|                  | 230                                                                          | 240  | 250  | 260  | 270  | 280  | 290  |
| CTR_ABC-B1_S.seq | CTAACTGGCGATATCATCAAGTATGCCGCATCGAAATTCACCATAGCATGTCAGAAGACGACAGAATCAAAGCG   |      |      |      |      |      |      |
| CTR_ABC-B1_R.seq | CTAACTGGCGATATCATCAAGTATGCCGCATCGAAATTCACCATAGCATGTCAGAAGACGACAGAATCAAAGCG   |      |      |      |      |      |      |
|                  | 310                                                                          | 320  | 330  | 340  | 350  | 360  | 370  |
| CTR_ABC-B1_S.seq | GAAATGATTTTTTCGATGGCGTCCAGTATTTTCGCTATGATGAACTCGATTATCGCTGTGGGAATGGTCATCATC  |      |      |      |      |      |      |
| CTR_ABC-B1_R.seq | GAAATGATTTTTTCGATGGCGTCCAGTATTTTCGCTATGATGAACTCGATTATCGCTGTGGGAATGGTCATCATC  |      |      |      |      |      |      |
|                  | 380                                                                          | 390  | 400  | 410  | 420  | 430  | 440  |
| CTR_ABC-B1_S.seq | AGCTATATATCGACGGTTACCTTCAACTACAGTGCCGACGAGACAAGTATTCGGATTGAGGTCCACATATCTGAGT |      |      |      |      |      |      |
| CTR_ABC-B1_R.seq | AGCTATATATCGACGGTTACCTTCAACTACAGTGCCGACGAGACAAGTATTCGGATTGAGGTCCACATATCTGAGT |      |      |      |      |      |      |
|                  | 460                                                                          | 470  | 480  | 490  | 500  | 510  | 520  |
| CTR_ABC-B1_S.seq | AAAATACTCAATCAGGACATCACTTGGTATGACATGCACCAAACCTGGAGATTTCTCGAGTAGAATGACAGAGGAT |      |      |      |      |      |      |
| CTR_ABC-B1_R.seq | AAAATACTCAATCAGGACATCACTTGGTATGACATGCACCAAACCTGGAGATTTCTCGAGTAGAATGACAGAGGAT |      |      |      |      |      |      |
|                  | 530                                                                          | 540  | 550  | 560  | 570  | 580  | 590  |
| CTR_ABC-B1_S.seq | CTGTTCAAATTCGAAGATGGAATTGGAGAAAAGGTCCCAATGTTCTGAACCTTCAAATCGTTTTTTTCGTTTCA   |      |      |      |      |      |      |
| CTR_ABC-B1_R.seq | CTGTTCAAATTCGAAGATGGAATTGGAGAAAAGGTCCCAATGTTCTGAACCTTCAAATCGTTTTTTTCGTTTCA   |      |      |      |      |      |      |
|                  | 610                                                                          | 620  | 630  | 640  | 650  | 660  | 670  |
| CTR_ABC-B1_S.seq | TTGATAATAGCGCTAGTCAAAGGCTGGGAATTGGCACTCATCTGCCTCACCTCATTGCCAGCATCCCTCATCGCA  |      |      |      |      |      |      |
| CTR_ABC-B1_R.seq | TTGATAATAGCGCTAGTCAAAGGCTGGGAATTGGCACTCATCTGCCTCACCTCATTGCCAGCATCCCTCATCGCA  |      |      |      |      |      |      |
|                  | 680                                                                          | 690  | 700  | 710  | 720  | 730  | 740  |
| CTR_ABC-B1_S.seq | TTAGGGATCGTCGGTTTGTTCACCACCAAATTATCCAAAAAGAACTGGATGCTTATGGTACTGCAGGTGCAATA   |      |      |      |      |      |      |
| CTR_ABC-B1_R.seq | TTAGGGATCGTCGGTTTGTTCACCACCAAATTATCCAAAAAGAACTGGATGCTTATGGTACTGCAGGTGCAATA   |      |      |      |      |      |      |
|                  | 760                                                                          | 770  | 780  | 790  | 800  | 810  | 820  |
| CTR_ABC-B1_S.seq | GCAGAAGAAGTTCTCTCTTCAATCAGGACAGTTATAGCCTTCGGCGGTCAACACAAAGAAATAGAGAGATACGGG  |      |      |      |      |      |      |
| CTR_ABC-B1_R.seq | GCAGAAGAAGTTCTCTCTTCAATCAGGACAGTTATAGCCTTCGGCGGTCAACACAAAGAAATAGAGAGATACGGG  |      |      |      |      |      |      |
|                  | 830                                                                          | 840  | 850  | 860  | 870  | 880  | 890  |
| CTR_ABC-B1_S.seq | AACAATTTGATTTTCGCAAGCAAGAACAATATCAAAGATCTCTGCTATCCGCGATAGGATTCCGTATCTTGTGG   |      |      |      |      |      |      |
| CTR_ABC-B1_R.seq | AACAATTTGATTTTCGCAAGCAAGAACAATATCAAAGATCTCTGCTATCCGCGATAGGATTCCGTATCTTGTGG   |      |      |      |      |      |      |
|                  | 910                                                                          | 920  | 930  | 940  | 950  | 960  | 970  |
| CTR_ABC-B1_S.seq | TTTCTGATTTATTCCAGTTACGCCTTAGCATTTCTGGTACGGGGTCAAGCTGGTTCTGGAACAAAGGGATTGGGAG |      |      |      |      |      |      |
| CTR_ABC-B1_R.seq | TTTCTGATTTATTCCAGTTACGCCTTAGCATTTCTGGTACGGGGTCAAGCTGGTTCTGGAACAAAGGGATTGGGAG |      |      |      |      |      |      |
|                  | 980                                                                          | 990  | 1000 | 1010 | 1020 | 1030 | 1040 |
| CTR_ABC-B1_S.seq | AATCCTGTATACACTGCCGGTAACATGGTGACTGTATTCTTAGTGTGATGAATGGTCCATGAATTCGGGGATT    |      |      |      |      |      |      |
| CTR_ABC-B1_R.seq | AATCCTGTATACACTGCCGGTAACATGGTGACTGTATTCTTAGTGTGATGAATGGTCCATGAATTCGGGGATT    |      |      |      |      |      |      |
|                  | 1060                                                                         | 1070 | 1080 | 1090 | 1100 | 1110 | 1120 |
| CTR_ABC-B1_S.seq | TCATCCCGTACATCGAGGCATTTCGGTATATCGAAGGCAGCAGCTTCTAAAATTTTCAGCGTTATCGACAATACC  |      |      |      |      |      |      |
| CTR_ABC-B1_R.seq | TCATCCCGTACATCGAGGCATTTCGGTATATCGAAGGCAGCAGCTTCTAAAATTTTCAGCGTTATCGACAATACC  |      |      |      |      |      |      |
|                  | 1130                                                                         | 1140 | 1150 | 1160 | 1170 | 1180 | 1190 |
| CTR_ABC-B1_S.seq | CCCACCATCAATCTCTCGAAAGGAAAAGGGGAAATACTTGATACTCTCAAAGGGAATATCAAATTCAGGAATGTC  |      |      |      |      |      |      |
| CTR_ABC-B1_R.seq | CCCACCATCAATCTCTCGAAAGGAAAAGGGGAAATACTTGATACTCTCAAAGGGAATATCAAATTCAGGAATGTC  |      |      |      |      |      |      |
|                  | 1210                                                                         | 1220 | 1230 | 1240 | 1250 | 1260 | 1270 |
| CTR_ABC-B1_S.seq | AATTTCCACTATCCATCCAGACCAGACGTTACGGTTTTACAAGACTTGAGTTTGACATAAGAGCAGGCGATACC   |      |      |      |      |      |      |
| CTR_ABC-B1_R.seq | AATTTCCACTATCCATCCAGACCAGACGTTACGGTTTTACAAGACTTGAGTTTGACATAAGAGCAGGCGATACC   |      |      |      |      |      |      |
|                  | 1280                                                                         | 1290 | 1300 | 1310 | 1320 | 1330 | 1340 |

|                         |                                                                              |
|-------------------------|------------------------------------------------------------------------------|
| <i>CTR_ABC-B1_S.seq</i> | GTAGCTCTGGTCGGAAGTTCCGGTTGTGGTAAATCAACTGTGATTCAACTGATCCAAAGATTTTATGACCTGTCT  |
| <i>CTR_ABC-B1_R.seq</i> | GTAGCTCTGGTCGGAAGTTCCGGTTGTGGTAAATCAACTGTGATTCAACTGATCCAAAGATTTTATGACCTGTCT  |
| <i>CTR_ABC-B1_S.seq</i> | 1360 1370 1380 1390 1400 1410 1420                                           |
| <i>CTR_ABC-B1_R.seq</i> | GCTGGCGAGGTGTCCATCGATGGTAAGAATATAAAAGACCTCGACCTCACCTGGATGCGAACGAACATCGGCGTC  |
| <i>CTR_ABC-B1_S.seq</i> | GCTGGCGAGGTGTCCATCGATGGTAAGAATATAAAAGACCTCGACCTCACCTGGATGCGAACGAACATCGGCGTC  |
| <i>CTR_ABC-B1_S.seq</i> | 1430 1440 1450 1460 1470 1480 1490                                           |
| <i>CTR_ABC-B1_R.seq</i> | GTGGGCCAAGAACCAGTTCTGTTTCGGAACCACCATCATGAAAATATAAAGTACGGAATGCGGACGCAACCGAA   |
| <i>CTR_ABC-B1_S.seq</i> | GTGGGCCAAGAACCAGTTCTGTTTCGGAACCACCATCATGAAAATATAAAGTACGGAATGCGGACGCAACCGAA   |
| <i>CTR_ABC-B1_S.seq</i> | 1510 1520 1530 1540 1550 1560 1570                                           |
| <i>CTR_ABC-B1_R.seq</i> | GATGACGTCGTCGTGGCAGCTAAGAAGGCGAATGCACATACTTTCATCAAATCGCTTCGAAACGATACAACACT   |
| <i>CTR_ABC-B1_S.seq</i> | GATGACGTCGTCGTGGCAGCTAAGAAGGCGAATGCACATACTTTCATCAAATCGCTTCG----GATACAACACT   |
| <i>CTR_ABC-B1_S.seq</i> | 1580 1590 1600 1610 1620 1630 1640                                           |
| <i>CTR_ABC-B1_R.seq</i> | CTGGTGGGCGAAAGGGGGCGCAATTGTCTGGGGGGCAGAAGCAGCGAATAGCCATAGCCAGAGCTCTGGTGAGG   |
| <i>CTR_ABC-B1_S.seq</i> | CTGGTGGGCGAAAGGGGGCGCAATTGTCTGGGGGGCAGAAGCAGCGAATAGCCATAGCCAGAGCTCTGGTGAGG   |
| <i>CTR_ABC-B1_S.seq</i> | 1660 1670 1680 1690 1700 1710 1720                                           |
| <i>CTR_ABC-B1_R.seq</i> | AAACCATCGATACTGCTCTTGACGAAAGCCACTTCCGCGTTGGACAATAACAGTGAGGCCAAAGTTCAAGCTGCT  |
| <i>CTR_ABC-B1_S.seq</i> | AAACCATCGATACTGCTCTTGACGAAAGCCACTTCCGCGTTGGACAATAACAGTGAGGCCAAAGTTCAAGCTGCT  |
| <i>CTR_ABC-B1_S.seq</i> | 1730 1740 1750 1760 1770 1780 1790                                           |
| <i>CTR_ABC-B1_R.seq</i> | CTAGACTCGGCTAGTGTGGATTGCACGACAGTCATTGTGCTCATCGGTTGTCCACCATAACAAGGAGCTAACAAG  |
| <i>CTR_ABC-B1_S.seq</i> | CTAGACTCGGCTAGTGTGGATTGCACGACAGTCATTGTGCTCATCGGTTGTCCACCATAACAAGGAGCTAACAAG  |
| <i>CTR_ABC-B1_S.seq</i> | 1810 1820 1830 1840 1850 1860 1870                                           |
| <i>CTR_ABC-B1_R.seq</i> | ATAATGGTGTTCGAAAGGCGCTGTTGTAGAACAAAGGCACTCACGATGAGTTATGGCACTTAAGAACGAGTAT    |
| <i>CTR_ABC-B1_S.seq</i> | ATAATGGTGTTCGAAAGGCGCTGTTGTAGAACAAAGGCACTCACGATGAGTTATGGCACTTAAGAACGAGTAT    |
| <i>CTR_ABC-B1_S.seq</i> | 1880 1890 1900 1910 1920 1930 1940                                           |
| <i>CTR_ABC-B1_R.seq</i> | TATAATCTAGTAACGACACAAGTCAAGAGTAAAGAAACGGTGACACAATATAGTAAGAGTGATAAGACTCAAGAA  |
| <i>CTR_ABC-B1_S.seq</i> | TATAATCTAGTAACGACACAAGTCAAGAGTAAAGAAACGGTGACACAATATAGTAAGAGTGATAAGACTCAAGAA  |
| <i>CTR_ABC-B1_S.seq</i> | 1960 1970 1980 1990 2000 2010 2020                                           |
| <i>CTR_ABC-B1_R.seq</i> | TATGATGATGATATCGATGAAGTTGTTCCAGTAGAAGCCTCCTTTGCAGCTGAAGATGATGAGGATGATTTTCGTA |
| <i>CTR_ABC-B1_S.seq</i> | TATGATGATGATATCGATGAAGTTGTTCCAGTAGAAGCCTCCTTTGCAGCTGAAGATGATGAGGATGATTTTCGTA |
| <i>CTR_ABC-B1_S.seq</i> | 2030 2040 2050 2060 2070 2080 2090                                           |
| <i>CTR_ABC-B1_R.seq</i> | TCAGACAGAAACATGAGATTGATTGATGTGATCAAAATGAATGCCCCAGAATGGCCACAAATGTGGTGGCCAGT   |
| <i>CTR_ABC-B1_S.seq</i> | TCAGACAGAAACATGAGATTGATTGATGTGATCAAAATGAATGCCCCAGAATGGCCACAAATGTGGTGGCCAGT   |
| <i>CTR_ABC-B1_S.seq</i> | 2110 2120 2130 2140 2150 2160 2170                                           |
| <i>CTR_ABC-B1_R.seq</i> | ATCGGGTCTACTGTTATAGGCTGTGCCATGCCAATTTTTCTGTTTTATTTGGAAGCATTATTGGAACCTAGCC    |
| <i>CTR_ABC-B1_S.seq</i> | ATCGGGTCTACTGTTATAGGCTGTGCCATGCCAATTTTTCTGTTTTATTTGGAAGCATTATTGGAACCTAGCC    |
| <i>CTR_ABC-B1_S.seq</i> | 2180 2190 2200 2210 2220 2230 2240                                           |
| <i>CTR_ABC-B1_R.seq</i> | AACAGTGATACAGAATACGTTAGAACAGAAACCAACAATAACGTCGTGACTTTGTTATCGCAGGTGCTGTGGCT   |
| <i>CTR_ABC-B1_S.seq</i> | AACAGTGATACAGAATACGTTAGAACAGAAACCAACAATAACGTCGTGACTTTGTTATCGCAGGTGCTGTGGCT   |
| <i>CTR_ABC-B1_S.seq</i> | 2260 2270 2280 2290 2300 2310 2320                                           |
| <i>CTR_ABC-B1_R.seq</i> | ATGGTATCAGTATTCCTTCAGATGTATATGTTTGGTATAGCTGGAGAAAAATGACCAGAGAATACGAGGCAAA    |
| <i>CTR_ABC-B1_S.seq</i> | ATGGTATCAGTATTCCTTCAGATGTATATGTTTGGTATAGCTGGAGAAAAATGACCAGAGAATACGAGGCAAA    |
| <i>CTR_ABC-B1_S.seq</i> | 2330 2340 2350 2360 2370 2380 2390                                           |
| <i>CTR_ABC-B1_R.seq</i> | ATGTTTTAGCTATGCTGAACCAAGAAATCGGATTTTTCGACAAGAAAACCAACGGAGTTGGGGCTCTGTGTGCC   |
| <i>CTR_ABC-B1_S.seq</i> | ATGTTTTAGCTATGCTGAACCAAGAAATCGGATTTTTCGACAAGAAAACCAACGGAGTTGGGGCTCTGTGTGCC   |
| <i>CTR_ABC-B1_S.seq</i> | 2410 2420 2430 2440 2450 2460 2470                                           |
| <i>CTR_ABC-B1_R.seq</i> | AAACTTTCTAGCGATGCTGCAAGCGTTACGGGAGCAACAGGGCAAAGAGTTGGCGTAGTTTTGCAGTCGATGGCC  |
| <i>CTR_ABC-B1_S.seq</i> | AAACTTTCTAGCGATGCTGCAAGCGTTACGGGAGCAACAGGGCAAAGAGTTGGCGTAGTTTTGCAGTCGATGGCC  |
| <i>CTR_ABC-B1_S.seq</i> | 2480 2490 2500 2510 2520 2530 2540                                           |
| <i>CTR_ABC-B1_R.seq</i> | ACATTTTGCCTAGCAGTTGGTCTCGCCATGTATTATGAATACAGATTGGGGCTTGTTACTGTGGCTTTTCATGCCA |
| <i>CTR_ABC-B1_S.seq</i> | ACATTTTGCCTAGCAGTTGGTCTCGCCATGTATTATGAATACAGATTGGGGCTTGTTACTGTGGCTTTTCATGCCA |
| <i>CTR_ABC-B1_S.seq</i> | 2560 2570 2580 2590 2600 2610 2620                                           |
| <i>CTR_ABC-B1_R.seq</i> | TTTCTTCTATAGCATCTTTTTCGAGAGGAGGAATCTTCTGGACAGAATGATACACGAGACCAATCACTACAA     |
| <i>CTR_ABC-B1_S.seq</i> | TTTCTTCTATAGCATCTTTTTCGAGAGGAGGAATCTTCTGGACAGAATGATACACGAGACCAATCACTACAA     |

|                  |                                                                              |      |      |      |      |      |      |
|------------------|------------------------------------------------------------------------------|------|------|------|------|------|------|
|                  | 2630                                                                         | 2640 | 2650 | 2660 | 2670 | 2680 | 2690 |
| CTR_ABC-B1_S.seq | AAATCAACGAAGATTGCCGTAGAAGGGGTAGGAAACATACGAACGGTAGCGTCTTTGGGTTTGGAGGAAAAGTTC  |      |      |      |      |      |      |
| CTR_ABC-B1_R.seq | AAATCAACGAAGATTGCCGTAGAAGGGGTAGGAAACATACGAACGGTAGCGTCTTTGGGTTTGGAGGAAAAGTTC  |      |      |      |      |      |      |
|                  | 2710                                                                         | 2720 | 2730 | 2740 | 2750 | 2760 | 2770 |
| CTR_ABC-B1_S.seq | CATCATCTGTATATATCCGAACCTTCTACCACACTACAAAAATTCTAGTAGCGCTTCGTTACACTGGCGGGGAATA |      |      |      |      |      |      |
| CTR_ABC-B1_R.seq | CATCATCTGTATATATCCGAACCTTCTACCACACTACAAAAATTCTAGTAGCGCTTCGTTACACTGGCGGGGAATA |      |      |      |      |      |      |
|                  | 2780                                                                         | 2790 | 2800 | 2810 | 2820 | 2830 | 2840 |
| CTR_ABC-B1_S.seq | GTCTTTGGTTTGTCTGAGGGGTTTGCATTTTTCGCCTACTCCGCTGCCATGTACTACGAGGGCTATTGTATCAAA  |      |      |      |      |      |      |
| CTR_ABC-B1_R.seq | GTCTTTGGTTTGTCTGAGGGGTTTGCATTTTTCGCCTACTCCGCTGCCATGTACTACGAGGGCTATTGTATCAAA  |      |      |      |      |      |      |
|                  | 2860                                                                         | 2870 | 2880 | 2890 | 2900 | 2910 | 2920 |
| CTR_ABC-B1_S.seq | AACGAAAACCTTATCGTACGAGAAAGTTTTCAAAGTTTCCCAAGCGCTCATAATGGGAACACTTCCATAGCCAAT  |      |      |      |      |      |      |
| CTR_ABC-B1_R.seq | AACGAAAACCTTATCGTACGAGAAAGTTTTCAAAGTTTCCCAAGCGCTCATAATGGGAACACTTCCATAGCCAAT  |      |      |      |      |      |      |
|                  | 2930                                                                         | 2940 | 2950 | 2960 | 2970 | 2980 | 2990 |
| CTR_ABC-B1_S.seq | GCACTCGCTTTCCTCCAACTTCACGAAAGGCTTGAATGCAGCGAAGAGCGTTTCAAGAGTTCCTGGAGAGGATG   |      |      |      |      |      |      |
| CTR_ABC-B1_R.seq | GCACTCGCTTTCCTCCAACTTCACGAAAGGCTTGAATGCAGCGAAGAGCGTTTCAAGAGTTCCTGGAGAGGATG   |      |      |      |      |      |      |
|                  | 3010                                                                         | 3020 | 3030 | 3040 | 3050 | 3060 | 3070 |
| CTR_ABC-B1_S.seq | CCGAAAATCAGGGACGATATGAATTCCAAAGATGTGAATGAGGTGGAAGGTGACATCTCATTTCGAAAAATCAAA  |      |      |      |      |      |      |
| CTR_ABC-B1_R.seq | CCGAAAATCAGGGACGATATGAATTCCAAAGATGTGAATGAGGTGGAAGGTGACATCTCATTTCGAAAAATCAAA  |      |      |      |      |      |      |
|                  | 3080                                                                         | 3090 | 3100 | 3110 | 3120 | 3130 | 3140 |
| CTR_ABC-B1_S.seq | TTCGCATATCCAACCAGACCAGGACAACGGTGCTTCGTGACCTTGACCTTAGGATATTCAAGGGGAAAACGGTG   |      |      |      |      |      |      |
| CTR_ABC-B1_R.seq | TTCGCATATCCAACCAGACCAGGACAACGGTGCTTCGTGACCTTGACCTTAGGATATTCAAGGGGAAAACGGTG   |      |      |      |      |      |      |
|                  | 3160                                                                         | 3170 | 3180 | 3190 | 3200 | 3210 | 3220 |
| CTR_ABC-B1_S.seq | GCGCTCGTAGGGCAGAGTGGCTGCGGCAAACTACCTCCTACACAGCTCATCGAGCGATTCTACGATCCAACCGA   |      |      |      |      |      |      |
| CTR_ABC-B1_R.seq | GCGCTCGTAGGGCAGAGTGGCTGCGGCAAACTACCTCCTACACAGCTCATCGAGCGATTCTACGATCCAACCGA   |      |      |      |      |      |      |
|                  | 3230                                                                         | 3240 | 3250 | 3260 | 3270 | 3280 | 3290 |
| CTR_ABC-B1_S.seq | GGAGAAGTGATGCTGGACGACATACAGCTCAAAAGAATGAAGCTGCGTTCTCTGAGATCGCATCTGGGGATCGTG  |      |      |      |      |      |      |
| CTR_ABC-B1_R.seq | GGAGAAGTGATGCTGGACGACATACAGCTCAAAAGAATGAAGCTGCGTTCTCTGAGATCGCATCTGGGGATCGTG  |      |      |      |      |      |      |
|                  | 3310                                                                         | 3320 | 3330 | 3340 | 3350 | 3360 | 3370 |
| CTR_ABC-B1_S.seq | TCGCAGGAACCCAACTCTTCAACAAGACTATCAGGGAGAACATTTTCGTATGGGGACAATGGACGTGTTGTTCA   |      |      |      |      |      |      |
| CTR_ABC-B1_R.seq | TCGCAGGAACCCAACTCTTCAACAAGACTATCAGGGAGAACATTTTCGTATGGGGACAATGGACGTGTTGTTCA   |      |      |      |      |      |      |
|                  | 3380                                                                         | 3390 | 3400 | 3410 | 3420 | 3430 | 3440 |
| CTR_ABC-B1_S.seq | ATGGATGAGGTTATACAGGCTGCCGTGAATGCTAAATCCACACCTTCATCAGCGGACTACCAAAGGGTTATGAA   |      |      |      |      |      |      |
| CTR_ABC-B1_R.seq | ATGGATGAGGTTATACAGGCTGCCGTGAATGCTAAATCCACACCTTCATCAGCGGACTACCAAAGGGTTATGAA   |      |      |      |      |      |      |
|                  | 3460                                                                         | 3470 | 3480 | 3490 | 3500 | 3510 | 3520 |
| CTR_ABC-B1_S.seq | ACTACGCTGGGAGAAAAAGCTGTGCAATTATCAGGTGGACAGAAACAGCGAATCGCTATTGCTAGGGCCTTAGTA  |      |      |      |      |      |      |
| CTR_ABC-B1_R.seq | ACTACGCTGGGAGAAAAAGCTGTGCAATTATCAGGTGGACAGAAACAGCGAATCGCTATTGCTAGGGCCTTAGTA  |      |      |      |      |      |      |
|                  | 3530                                                                         | 3540 | 3550 | 3560 | 3570 | 3580 | 3590 |
| CTR_ABC-B1_S.seq | AGAAATCCGAAAGTATTATTACTGGATGAGGCTACCTCTGCGTTGGATACTGAAAGCGAAAAGCTTGTTCAGAA   |      |      |      |      |      |      |
| CTR_ABC-B1_R.seq | AGAAATCCGAAAGTATTATTACTGGATGAGGCTACCTCTGCGTTGGATACTGAAAGCGAAAAGCTTGTTCAGAA   |      |      |      |      |      |      |
|                  | 3610                                                                         | 3620 | 3630 | 3640 | 3650 | 3660 | 3670 |
| CTR_ABC-B1_S.seq | GCTCTAGACCAAGCAAGTTGGGTAGAACGTGTATAACAATCGCTCATCGACTTTTCGACCATCCAAGATGCAGAT  |      |      |      |      |      |      |
| CTR_ABC-B1_R.seq | GCTCTAGACCAAGCAAGTTGGGTAGAACGTGTATAACAATCGCTCATCGACTTTTCGACCATCCAAGATGCAGAT  |      |      |      |      |      |      |
|                  | 3680                                                                         | 3690 | 3700 | 3710 | 3720 | 3730 | 3740 |
| CTR_ABC-B1_S.seq | ATGATTTGTGTGATTGACCGGGGAATAGTAGCCGAAGCTGGAACCTCATGCAGAGCTATTAGAGAAAAAGGTCTC  |      |      |      |      |      |      |
| CTR_ABC-B1_R.seq | ATGATTTGTGTGATTGACCGGGGAATAGTAGCCGAAGCTGGAACCTCATGCAGAGCTATTAGAGAAAAAGGTCTC  |      |      |      |      |      |      |
|                  | 3760                                                                         | 3770 |      |      |      |      |      |
| CTR_ABC-B1_S.seq | TATTATAAGTTGCAAAGACAGACAACCTGA                                               |      |      |      |      |      |      |
| CTR_ABC-B1_R.seq | TATTATAAGTTGCAAAGACAGACAACCTGA                                               |      |      |      |      |      |      |

**Figure S1.** Comparison between CtABCBI cDNA sequences derived from either the susceptible or the resistant populations. Nucleotide sequences corresponding to the cDNAs (open reading frames) of CtABCBI cloned from the *C. tremula* susceptible (S) and the resistant (R) populations were aligned using CLUSTAL W (version 2.0.12). The 23 single nucleotide polymorphisms (SNPs) are shaded in grey. Only 5 SNPs are non-synonymous. The four-base pair deletion present in *abc-b1* is located at position 1561.

|            |                                                                                                              |      |
|------------|--------------------------------------------------------------------------------------------------------------|------|
| CTR_ABC-B1 | MGKREKYSLDKKNKSPLDVEFTKNEEKEGDKTKQVSFFQMFRYATGFDKLLLSIGIISAVGTGVLQPM                                         | 68   |
| CTR_ABC-B1 | NTILFGTLTGDIKYAASKFN <sup>Y</sup> <u>NHSM</u> SEDDRIKAENDDFDGVQYFAMMNSIIAVGMV <sup>Y</sup> IISTVTFNYS        | 136  |
| CTR_ABC-B1 | ATRQVFRLRSTYLSKILNQDITWYDMHQTDGDFSSRMTEDLFKFEDGIGEKVPMFLNLQIVFFVSLIIA                                        | 204  |
| CTR_ABC-B1 | LVKGWELALICLTSLPASLIALGIVGLLT <sup>Y</sup> TKLSKKELDAYGTAGATAEEVLSSIRTVIAFGGQHKEIE                           | 272  |
| CTR_ABC-B1 | RYGNLIFARKNNIKR <sup>Y</sup> SLLSAIGFGILWFLIYSSYALAFWYGVKLVLEQRDWNENPVYTAGNMVTVFFS                           | 340  |
| CTR_ABC-B1 | VMNGSMNFGISSPYIEAFGISKAAASKIFSVIDNTPTINLSKGKGEILDTLKGNIKFRNVNFHYPSRP                                         | 408  |
| CTR_ABC-B1 | DVTVLQDLSLDIRAGDTVALV <sup>Y</sup> GSSGCGKSTVIQLIQRFYDPVAGEVSIDGKNIKDLDTWMRTNIGVV                            | 476  |
| CTR_ABC-B1 | GQEPVLFGTTIMENIKYGNADATEDDVVAAKANAHTFIKSLPNGYNTLVGERGAQLSGGQKQRIAI                                           | 544  |
| CTR_ABC-B1 | ARALVRKPSILLLDEATSALDNNSEAKVQAALDSASVDCTTVIVAHRLSTIQGANKIMVFSKGAVVEQ                                         | 612  |
| CTR_ABC-B1 | GTHDELMALKNEYNLVTTQVKSKEVTQYKSDKTQEYDDDDIDEVVPVEASFAAEDDEDDFVSDRNM                                           | 680  |
| CTR_ABC-B1 | RLIDVIKMAPEWPQIVVASIGSTVIGCAMPIFS <sup>Y</sup> VLFGSIIIGTLANSDEYVRTETNKYVVYFVIAGA                            | 748  |
| CTR_ABC-B1 | VAMVSVFLQYMFGIAGEKMTERIRGKMFSAMLNQEIGFFDKKTNGVGALCAKLSSDAASVQGATGQR                                          | 816  |
| CTR_ABC-B1 | VGVVLQSMATFCLAVGLAMYYEYRLGLVTVAFMPFLIIAFFFERRNSSGQNDTRDQSLQKSTKIAVEG                                         | 884  |
| CTR_ABC-B1 | VGNIRTVASLGLEEFHHLIYISELLPHYKNSSASLHWRGIVFGLSRGLSFFAYSAA <sup>Y</sup> MYGGYLIKNE                             | 952  |
| CTR_ABC-B1 | <sup>Y</sup> NLSYEK <sup>Y</sup> VFKVSQALIMGTTSIANALAF <sup>Y</sup> TNFTKGLNAAKSVQKFLERMPKIRDDMNSKDVNEVEGDIS | 1020 |
| CTR_ABC-B1 | FAKIKFAYPTRPGTTVLRDLRLIFKGTVALV <sup>Y</sup> GQSGCGKSTLIQLIERFYDPTGGEVMLDDIDVKRM                             | 1088 |
| CTR_ABC-B1 | KLRSLRSHLGIVSQEPNLFNKTIRENISYGDNGRVVQMDEVIQAAVNANIHTFISGLPKGYETTLGEK                                         | 1156 |
| CTR_ABC-B1 | AVQLSGGQKQRIAIARALVRNPKVLLLDEATSALDTESEKVVQEALDQAKLGRTCITIAHRLSTIQDA                                         | 1224 |
| CTR_ABC-B1 | DMICVIDRGIVAEAGTHAELEKKGLYYKLQRQTT                                                                           | 1259 |

**Figure S2.** Predicted protein sequence of CtABC1. Feature predictions include 12 transmembrane helices (pink), two ATP-binding domains (green), two transporter motifs (blue), and predicted glycosylation sites on the outside loops (underlined in blue, and indicated by 'Y'). The position of the four-base-pair deletion is indicated by a red arrow.

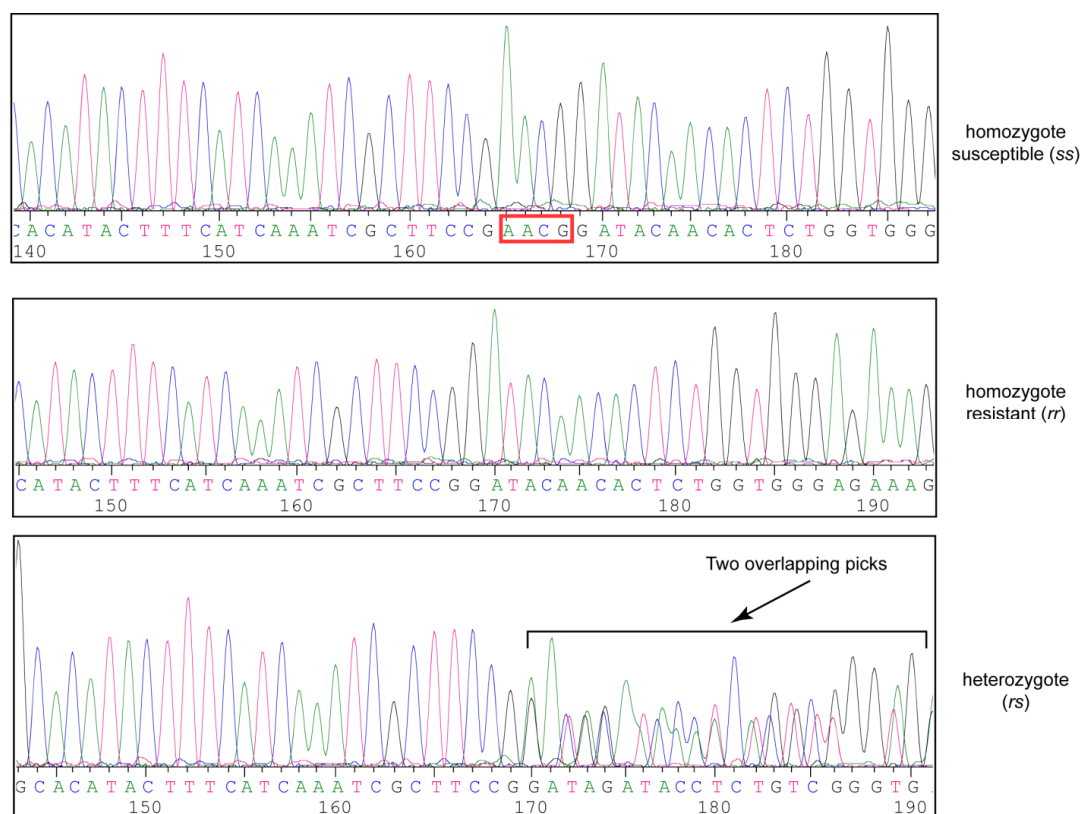

**Figure S3.** Determination of the genotype for the backcrosses between susceptible and resistant *C. tremula*. Genomic DNA was prepared from the grandparents, parents and offspring of each backcross. A primer pair was designed to amplify by PCR the region where the deletion is located in CtABC B1. PCR products were then processed by Sanger sequencing. The four nucleotides present in the “normal” version of *abc-b1* but absent in resistant individuals is boxed in red.

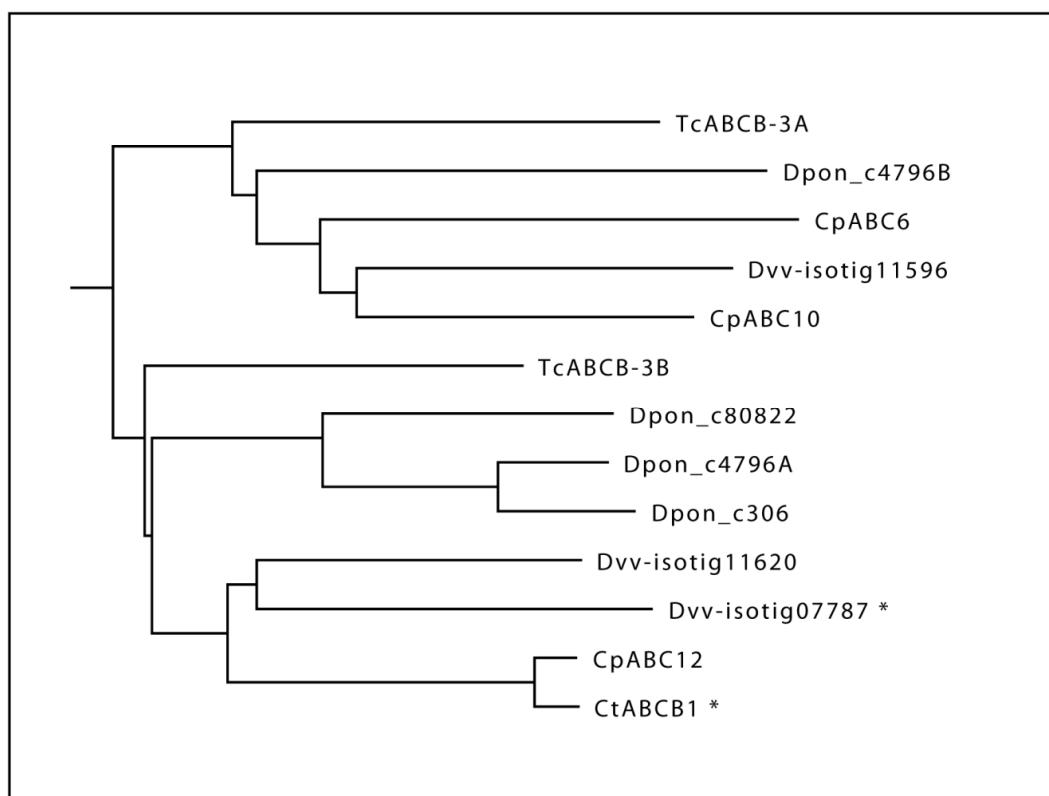

**Figure S4.** Neighbor-joining tree of full-transporter ABCB protein sequences from Coleoptera. Tc: *Tribolium castaneum*, Dpon: *Dendroctonus ponderosae*, Cp: *Chrysomela populi*, Dvv: *Diabrotica virgifera virgifera*, Ct: *Chrysomela tremula*. \* The asterisks denote proteins genetically linked to Cry3 toxin resistance.

|                               |     |                                                      |     |
|-------------------------------|-----|------------------------------------------------------|-----|
| TcABCB-3A                     | 1   | MAKDDFQENGLEETVPLNTEYVKNKLKIKKTKDGKKEDKKEE-----      | 43  |
| Dpon_c4796B                   | 1   | MEIKKNHSSDQQEPPERQ-----                              | 18  |
| CpABC6                        | 1   | MCQVSYRQPESLARSCLK-----                              | 18  |
| Dvv-isotig11596               | 1   | MGNKKNNENDLKCEKNKTN-----                             | 18  |
| CpABC10                       | 1   | MGERKLYSVDKSEKKDKSKKVPNDS                            | 25  |
| TcABCB-3B                     | 1   | MGKKAYDLESSEKNGKDALTEFVQEPSEK-----L                  | 32  |
| Dpon_c80822                   | 1   | MSDEK---HDQKNGVDKPSPLEAKFQPPDP-----D                 | 29  |
| Dpon_c4796A                   | 1   | MAAKKTDGDQDGKAADKKQALDVKFQSIDDPADP--D                | 35  |
| Dpon_c306                     | 1   | MTER-----HDGTATDKERASDVNVPPIDDP-----                 | 26  |
| Dvv-isotig11620               | 1   | MTEEK-----KHSIKDKEKIGIDAQFVNSEEPK-----               | 28  |
| Dvv-isotig07787               | 1   | MG-TK-----KDDIKEKKTNALDAKFVKKKENE-----               | 27  |
| CpABC12                       | 1   | MGKRE-----KYSLDKKNKSPLDVEFTKNEEKEG----               | 29  |
| Ct-ABCB1                      | 1   | MGKRE-----KYSLDKKNKSPLDVEFTKNEEKEG----               | 29  |
|                               |     |                                                      |     |
| TcABCB-3A                     | 44  | ----KISYFQLFRYTTLQDKLCIALGTLCAVICGCIQPYVMILFGDVTEV   | 89  |
| Dpon_c4796B                   | 19  | ---PDVPYHQLFQFATLLDKLLIAVGIIASIICGVFPYLMVLFQDVSGV    | 65  |
| CpABC6                        | 19  | ----IYFYKCFRYATALDKICLLVASSCTICCGILMPFAMLFFGDVTGS    | 64  |
| Dvv-isotig11596               | 19  | ----EISYLRFLFYCTTLDIIFMSIGAICAALSGIVQPYSMNTLFGDLTGA  | 64  |
| CpABC10                       | 26  | KEKQTIPYRFLFYSTNLNDKICLLASACTILCGALQPFMMTIFGEITGS    | 75  |
| TcABCB-3B                     | 33  | EKAPPVGFFLFRYATKWDTFMLMIAVFASIGTGILQPLNTLLFGDLTGT    | 82  |
| Dpon_c80822                   | 30  | EDISPPSFLQLRYATGWKFLFVIGVISALASGAIQPLNLLFGQLIQT      | 79  |
| Dpon_c4796A                   | 36  | EAVDASSFTGLYRFATQPQKYVIVIGAIIALISGALQPLNLLFGDLTQT    | 85  |
| Dpon_c306                     | 27  | ESTDASSFTGLYRFATRPQKCVIIIGAIIALICGALQPLNLLFGDLTQI    | 76  |
| Dvv-isotig11620               | 29  | EKIKNVSFPMFRYASTYDKFLMVVGLISATGTGVLQPLNTILFGSLTGD    | 78  |
| Dvv-isotig07787               | 28  | TKIKPISFFGMFYASKGDKLLMFIGTSLAVITGCLPPINTILFGELAGN    | 77  |
| CpABC12                       | 30  | DQTKQVSFFQMFYATGLDKVLLSIGIISAFGTGVLQPMNTILFGTLTGD    | 79  |
| Ct-ABCB1                      | 30  | DKTKQVSFFQMFYATGFDKLLLSIGIISAVGTGVLQPMNTILFGTLTGD    | 79  |
| . . . . . . . . . . *         |     |                                                      |     |
|                               |     |                                                      |     |
| TcABCB-3A                     | 90  | IIQFAETLKSN-NSEINRTQAVDDLFRGVTDFAIYSSSSGIVMIITTYLA   | 138 |
| Dpon_c4796B                   | 66  | LLDFTTAMNAN-LTFEEKLATEKLYDGTEYFAIMTSVSALIILVCTYIS    | 114 |
| CpABC6                        | 65  | IIDYAAAIKES-PPDEKEKLIETLRHEIGLFAAQAAIIIIAVIALLYLS    | 113 |
| Dvv-isotig11596               | 65  | IVTYASNYNES-LSEPEKTLADELINAVWLFGMKSVGVGIGVILTYYIS    | 113 |
| CpABC10                       | 76  | IVDYATAFNDS-ITEEQKAVLVEQLWSDMKIFVIYSCIIGIVTILATYIS   | 124 |
| TcABCB-3B                     | 83  | IVDYVFTINSNETSEEQKQATDVFIDGITDFAVYNTLIGVGLVLSYIS     | 132 |
| Dpon_c80822                   | 80  | IVDYAQICYDD-PSDDQCVSAGDGLIDGVTHYAIWNSAIGVGIFVTSYVS   | 128 |
| Dpon_c4796A                   | 86  | IIEYSQACFI--PSSTECGAAGDNLAGIKHFALWNSLNGVAIMITAYLA    | 133 |
| Dpon_c306                     | 77  | IIEYSEACLN--PNSTNCSVAGDNLSAGIKHFGIWSSINGVAIMITGYLA   | 124 |
| Dvv-isotig11620               | 79  | IIAYATS-IQINLPADQKKAEDNFFDGIRYFALMNSLIGIGMFVFSYLA    | 127 |
| Dvv-isotig07787               | 78  | AVQYAETLYNATLSQNEQAEQEKFFDGIKKFALANSVMGVAMLCSYLS     | 127 |
| CpABC12                       | 80  | IIKYAASKFNDSMSSEDDRIKAENFFDGVQYFALMNSIIAVGMVVISYIS   | 129 |
| Ct-ABCB1                      | 80  | IIKYAASKFNHMSSEDDRIKAENFFDGVQYFAMMNSIIAVGMVVISYIS    | 129 |
| . . . . . . . . . . *         |     |                                                      |     |
|                               |     |                                                      |     |
| TcABCB-3A                     | 139 | GILFSSSALRQIFHIRKLILQKTLNMDISWYDLNKTGDFATTTTENLSKL   | 188 |
| Dpon_c4796B                   | 115 | VVFFTQSSLRQTCKMRKLFMEKTINQDIGWYDQNTGDFASIIITDNIPKI   | 164 |
| CpABC6                        | 114 | VVLFSYTAVRQIFKMRSTFLENILNQDIEWFDRNHSGDFTTIFTQNIISKI  | 163 |
| Dvv-isotig11596               | 114 | TVLFIYSASRQIFKIRKAFLEKTLNQDIAWFDQNRGTGDFASTFTQNIISKI | 163 |
| CpABC10                       | 125 | VVLYSFSANRQIFKMRKMFLEKTLHQDQIGWFDINQTDGDFATTTQNIISKI | 174 |
| TcABCB-3B                     | 133 | TEFFNYTALKQVFKVRTLYLEKVFNQDISWYDVNNTGDFSSRMSDDL SKF  | 182 |
| Dpon_c80822                   | 129 | TEAFSYTAIKQVFRVRSKYLQALLNKDVPWFVDVHNSGDFASRMTDDLQRY  | 178 |
| Dpon_c4796A                   | 134 | TEAFSYNAIKQVFRVRSYLYQLLNKNDIPWFDVHNSGDFSSRMADDLSKF   | 183 |
| Dpon_c306                     | 125 | TEAFSYNAIKQVFRVRSYLYQLLNKNDISWFDVHNSGDFSSRMADDLSKF   | 174 |
| Dvv-isotig11620               | 128 | TVTFNYSAMRQIFKIRSAYLKSLNQDVGWYDINQTDGDFASRMSDDL SKF  | 177 |
| Dvv-isotig07787               | 128 | TITFNYSSTKQIFQIRSDYLSILNQDISWYDQNTGDFASRMSDDL SKF    | 177 |
| CpABC12                       | 130 | TVTFNYSATRQVFRRLRSIYLSKILNQDITWYDMHQTGDFSSRMTEDL SKF | 179 |
| Ct-ABCB1                      | 130 | TVTFNYSATRQVFRRLRSIYLSKILNQDITWYDMHQTGDFSSRMTEDL SKF | 179 |
| . . . * . . . . . . . . . . * |     |                                                      |     |



|                 |     |                                                    |     |
|-----------------|-----|----------------------------------------------------|-----|
| TcABCB-3A       | 189 | EEGIGEKVGIFLYFETIFVTGIVMGLVLGWELALICLISLPVSFAVAFLI | 238 |
| Dpon_c4796B     | 165 | EDGIGEKVGVVFLGTTCVSGMIWALIKGWQLALVCLASLPLQTLVMAI   | 214 |
| CpABC6          | 164 | EDGIGEKIGLFLYSIAWFLTGIIISLYEGWKLALVAMVSLPLSTILII   | 213 |
| Dvv-isotig11596 | 164 | EEGIGEKIGTFLFFESTFVAGCVLGLVKWKLALVCMVSLPLSTTIMTII  | 213 |
| CpABC10         | 175 | EEGIGEKIGVFLFFESTFVAGIIIALIKWKLALVCVVSPLSTIIMALI   | 224 |
| TcABCB-3B       | 183 | EDGIGEKVPMFVHFQATFLASLIMALVKWQLALICLISLPVLSMIAIGII | 232 |
| Dpon_c80822     | 179 | EDGIGEKMPFLMLQGTTFISAITLAMVKWQLALICLISLPVSLIAGLII  | 228 |
| Dpon_c4796A     | 184 | EDGIGEKVPLFLTLQGSFISAITLALVKWELALICLISLPVSLIAGLII  | 233 |
| Dpon_c306       | 175 | EDGIGEKVPLFLTLQGSFISAITLALVKWELALICLISLPVSFIAGLII  | 224 |
| Dvv-isotig11620 | 178 | EDGIGEKVPVWFVFSFQVFLTSLIIALVKWELALICLISLPATLITIGIV | 227 |
| Dvv-isotig07787 | 178 | EDGIGEKVPMFIHFQVLFVAAGTALAKWELALISLVAIPASLVSFGLII  | 227 |
| CpABC12         | 180 | EDGIGEKVPMFLNLQIVFFVSLIIALVKWELALICLISLPASLIALGLII | 229 |
| Ct-ABCB1        | 180 | EDGIGEKVPMFLNLQIVFFVSLIIALVKWELALICLISLPASLIALGLII | 229 |
|                 |     | *.*****. . ** * . . . . *                          |     |
| TcABCB-3A       | 239 | SWLSTKFSKQELEAYANAGAAIEEVLSSVTRTVAFDGGQKEFERIEKHLQ | 288 |
| Dpon_c4796B     | 215 | AWFSKAYCKQEMAAYSAGAIAEEVLSSIKTVVAFDGGQKEEKRYEKVFK  | 264 |
| CpABC6          | 214 | TKIAAKFSKQEMEAQDAGAAIEEVFGSIKTVVAFNGQDKECKIYEDHLV  | 263 |
| Dvv-isotig11596 | 214 | SWISTKFSQEMESYGEAGTIAEEVFTAIKTVVAFDGGQDKEIERYNKHLV | 263 |
| CpABC10         | 225 | TTISTKFSQQLEAYAGLAGSVAQEVLSIRTVVAFEGQKESRYHQHLV    | 274 |
| TcABCB-3B       | 233 | AVLTSKLAKKEQDAYGSAGSIAEEVLTSIRTVIAFGGQHKETRYDEELE  | 282 |
| Dpon_c80822     | 229 | AFLTTKFTSKELDAYGTAGSLAEVFTFIRTVVAFGGEKQEKERYDESILV | 278 |
| Dpon_c4796A     | 234 | AFLTTKFSKKELDAYAEAGSIAEEVLTSIRTVIGFGGEKLETQRYDKSLI | 283 |
| Dpon_c306       | 225 | AYLTTQFSKKELDAYAEAGSIAEEVITSIRTVIGFGGEKLETQRYEKNLI | 274 |
| Dvv-isotig11620 | 228 | GLLTTKLAKNELEAYGAAGSIAEEALSLIRTITAFGGQKKEVDRYNKNLV | 277 |
| Dvv-isotig07787 | 228 | NLLTTKLAKNEMEAAYAGSIAEEVFSLIRTVTAFGGQKKEIDRYKEHLV  | 277 |
| CpABC12         | 230 | GLLTTKLSKKELDAYGTAGAAIEEVLSSIRTVIAFGGQHKETERYGNLI  | 279 |
| Ct-ABCB1        | 230 | GLLTTKLSKKELDAYGTAGAAIEEVLSSIRTVIAFGGQHKETERYGNLI  | 279 |
|                 |     | . . . . * . * . * . . . . * . . . . *              |     |
| TcABCB-3A       | 289 | AAKNNIRKNLFTGVSNAVMWFFVFASYALSFWYGVGLILKEKELPYEER  | 338 |
| Dpon_c4796B     | 265 | IAQNNNVKRCFLNSINQGLWFLAYGALAFWYGVGLVIEERNLPEADR    | 314 |
| CpABC6          | 264 | HAERNNVLRCIFNSTNNFLLWFSMFACYSLTWCGIHLIIIGDRDLPEER  | 313 |
| Dvv-isotig11596 | 264 | DAKNNNLKRSFFTAVSNGCLWFFVYACYALSFWYGVTLILNDRHLPHEEQ | 313 |
| CpABC10         | 275 | HAQNNNIKRGFLNALSNGCLWFFVYACYALSFWYGVGLILEERQLPEAER | 324 |
| TcABCB-3B       | 283 | FAKNNNIKRSMTAIGFLLWFFIYGSYALAFWYGVKLVLDRNKPADK     | 332 |
| Dpon_c80822     | 279 | FARNNNIRRHFFEGIGYGLTWFCVFSYALAFWYGVKLMLDG-----NP   | 322 |
| Dpon_c4796A     | 284 | FARNNNIRRHFFEGIGYGLLWLCIFSSYGLAFWYGVKLMLDG-----NP  | 327 |
| Dpon_c306       | 275 | FAKNNIRRHFFEGIGYGLWLCIFSSYGLAFWYGIKMLDLG-----NP    | 318 |
| Dvv-isotig11620 | 278 | EAKNNNIRRSMSALGFLLWFMIIYASYALAFWYGVKLVLDRDRT--ATNQ | 325 |
| Dvv-isotig07787 | 278 | SARKNNIKRTMIVGIGFGLVYLLLYSSYALSFWYGVKLVLKDRF--NPNA | 325 |
| CpABC12         | 280 | FARKNNIKRSLLSAIGFGLWFLIYSSYALAFWYGVKLVLQDRD--WDNP  | 327 |
| Ct-ABCB1        | 280 | FARKNNIKRSLLSAIGFGLWFLIYSSYALAFWYGVKLVLQDRD--WENP  | 327 |
|                 |     | * ** . . . . * . . . * . * . . *                   |     |
| TcABCB-3A       | 339 | VYTPGNMVSFFCTLMASWNFGTGAPYFEIFGTACGAAAKVFEILDTPD   | 388 |
| Dpon_c4796B     | 315 | VYTPGNMMGVFFATLIASWNCGTISPYLEVFGMARGAFAKVFQVLESRPE | 364 |
| CpABC6          | 314 | VYTPSSLVTIFFATLGATWYFGLAAPLLEVFATARTAAQKVFVILDSKPK | 363 |
| Dvv-isotig11596 | 314 | VYTPANMVSFFSTLIATWNFGGLGAPLLETFTGAKGAAQKIFFVLDSKPV | 363 |
| CpABC10         | 325 | VYTAGNMVSFFCTLVATWNFGMGAPILEIFGAAGKAAQKIFAVLDSEPK  | 374 |
| TcABCB-3B       | 333 | VYDPGTMVTVFFSVMTGSMNFGISSPYIEAFGVARAAASKVYQIIDNIPK | 382 |
| Dpon_c80822     | 323 | VYTPGNMITVFFSVMAGSVGFGMASPFIEAFSTAKAAGGKIFHIIETSP  | 372 |
| Dpon_c4796A     | 328 | VYTPGNMITVFFSVMTGSMNFGVASPFIEAFATAKAAGGKIFHIIETSP  | 377 |
| Dpon_c306       | 319 | VYTPGNMLTV---VMAGSMSFGSASPFIEAFATAKAAGKIFHMIKTSP   | 365 |
| Dvv-isotig11620 | 326 | IYTPSNMVTVFFSVMTGSMNFGIASPYIEAFGISKAAASKIFSVIDHKPT | 375 |
| Dvv-isotig07787 | 326 | SYTPANMVTIFFAVLSASLNFGAASTYLEMFAISKAAAKIFNVIESKPD  | 375 |
| CpABC12         | 328 | VYTAGNMVTVFFSVMNGSMNFGISSPYIEAFGISKAAASKIFSVIDNTPT | 377 |
| Ct-ABCB1        | 328 | VYTAGNMVTVFFSVMNGSMNFGISSPYIEAFGISKAAASKIFSVIDNTPT | 377 |
|                 |     | * . . . . * . . * . * . . *                        |     |

|                 |     |                                                     |     |
|-----------------|-----|-----------------------------------------------------|-----|
| TcABCB-3A       | 389 | INLSKTKGLKPKNLKGDIVFKDVSFHYPSPRPDKILQNFSEIKAGQTV    | 438 |
| Dpon_c4796B     | 365 | MYKQYDVGKRP-DFMSNIAFKNVKFSYPSRANVQVLKNINLEIRFGETVA  | 413 |
| CpABC6          | 364 | INTIKEKGRKLYRFQNCIRFDEVYFSYPTRSELKVLWGFQDLQINIGETVA | 413 |
| Dvv-isotigl1596 | 364 | IRKFANSIVINDAALEVTFEDVHFSYPSRSDVKILRGINLTISKGETVA   | 413 |
| CpABC10         | 375 | INQSKSVGKKLDDFKSNIRFENVFFSYPARPDVKILQGLNLQINFGETIA  | 424 |
| TcABCB-3B       | 383 | INLSKNGDKIDNLKGDIFKRNVRVFPYPSRQDVPILLGLDLDIKAGQTV   | 432 |
| Dpon_c80822     | 373 | INLSKNNGKKPEEVKGNISFKNVHFYPSRKEVEVLQGLTLDAAGDTVA    | 422 |
| Dpon_c4796A     | 378 | INQSKNSGAKLDQVRGNIKLQNVKFQYPSRKDVPIQLQGIDLEIQAGDTVA | 427 |
| Dpon_c306       | 366 | INQSKNNGAKLAQVRGNIKLQNVKFQYPSRKDVPIQLQGIDLEIQAGDTVA | 415 |
| Dvv-isotigl1620 | 376 | INLSKNGKTLNVLIGNIQFKDVAFRYPSRKDVPIQLKGLSLNLSKSGDTVA | 425 |
| Dvv-isotig07787 | 376 | INLSKNSGAKLDHLKGNIQFKNVKFHYPSPRPDIPVLQGLDIEINPGETVA | 425 |
| CpABC12         | 378 | INLSKKGQQLDALKGNIKFRNVNFHYPSPRPDVTVLQDLSLDIKAGDTVA  | 427 |
| Ct-ABCB1        | 378 | INLSKKGGEILDTLKGNIKFRNVNFHYPSPRPDVTVLQDLSLDIRAGDTVA | 427 |
|                 |     | . * . * * * . . * . * * *                           |     |
| TcABCB-3A       | 439 | LVGSSGCGKSTCIQLIQRFYDAVTGTVKIDNNIKDLNLTWLRSKIGVVG   | 488 |
| Dpon_c4796B     | 414 | LVGSPSGGKSTIVQLMQRFYDPNSGMISIDDVNLKDVNLSYLRQNVGVVS  | 463 |
| CpABC6          | 414 | LVGSSGCGKSTCIQLLQRFYDPTLGRITIDDDVDIKDMSLKWLRKIAVVS  | 463 |
| Dvv-isotigl1596 | 414 | LVGKSGCGKSTCIQLLQRFYDPMGQIKINGIDIKQLNLDWLKQISVVS    | 463 |
| CpABC10         | 425 | LVGSSGCGKSTCIQLLQRFYDPVGVNVLIDGVNLRDLNLTWLRQKIAVVS  | 474 |
| TcABCB-3B       | 433 | LVGSSGCGKSTCIQLIQRFYDPLEGEVSLDGKNLKDFTLWLRNNIGVVG   | 482 |
| Dpon_c80822     | 423 | LVGSSGCGKSTVLQVLQRFYDALEGRVTIDGQDVKELDLTSYRQNIQVVS  | 472 |
| Dpon_c4796A     | 428 | LVGSSGCGKSTVLQVLQRFYDPLQGVFIDGKDVKDLDLWSYRQISVVS    | 477 |
| Dpon_c306       | 416 | LVGRSGCGKSTLLQVLQRFYDPLQGVFIDEKDVKELDLWSYRQYIGVVS   | 465 |
| Dvv-isotigl1620 | 426 | LVGSSGCGKSTVIQLLQRLYDADSGEVTIDGKNIKKEYDLTWLRSQIGVVG | 475 |
| Dvv-isotig07787 | 426 | LVGSSGCGKSTVVQLIQRFYNAVSGEILVDGTNIQNLDLTWYRNNIGVVG  | 475 |
| CpABC12         | 428 | LVGSSGCGKSTVIQLIQRFYDPSAGEVSDGKNIRDLDLTWRTNIGVVG    | 477 |
| Ct-ABCB1        | 428 | LVGSSGCGKSTVIQLIQRFYDPVAGEVSDGKNIKDLDLTWRTNIGVVG    | 477 |
|                 |     | *** ** .*** .*** * * . . . * . . **                 |     |
| TcABCB-3A       | 489 | QEPALFGATIAENIKFGNVTATQSDVERAAKKANAHNFIQKLPRGYNTVV  | 538 |
| Dpon_c4796B     | 464 | QEPSLFATTIAENIRYGKLSATMEEIIAAKKANAHRFVTNLPFGYQTVI   | 513 |
| CpABC6          | 464 | QEPALFTTTVAENIRFGKEGAPQEEIETAARKARVHEFILTLPNGYETVI  | 513 |
| Dvv-isotigl1596 | 464 | QEPDLFSTTIAENIRYGKLNATQQEIEENAAKKADIHTFIQTLPRGYQTVL | 513 |
| CpABC10         | 475 | QEPALFATTIAENIRLGKLDKQAEIEEAKKANVHKFILTLPHGYDTVI    | 524 |
| TcABCB-3B       | 483 | QEPVLFATTIAENIRYGNKATDEEIKNAAIKANAHEFIKKLPSPGYDTLV  | 532 |
| Dpon_c80822     | 473 | QEPVLFGTTIYENIRYGNKDATEEDITRAAKMANAHQFIKGLPHGYTLV   | 522 |
| Dpon_c4796A     | 478 | QEPVLFGTTIYENIRYGNKEATEQDIVQAAKMANAHRFIKGLPEGYHTLV  | 527 |
| Dpon_c306       | 466 | QEPVLFGTTIYENIRYGNKDATELDIVQAAKMANAHQFIKGLPGGYHTLV  | 515 |
| Dvv-isotigl1620 | 476 | QEPILFGTSILENIRYGKDGVTEDDIVQAAKMANAHNFIKALPNGYNTLV  | 525 |
| Dvv-isotig07787 | 476 | QEPVLFGTTIYENIRYGKEATEEEIEEAKKANAHAFIKLLPKGYNTLV    | 525 |
| CRW424          |     | FIKLLPKGYNTLV                                       |     |
| CpABC12         | 478 | QEPVLFGTTIMENIKYGNANEDDVIAAAKKANAHTFIKSLPNGYNTLV    | 527 |
| Ct-ABCB1        | 478 | QEPVLFGTTIMENIKYGNADATEDDVVVAKKANAHTFIKSLPNGYNTLV   | 527 |
|                 |     | *** ** . . . *** * . . ** * * * . * * * *           |     |
| TcABCB-3A       | 539 | GERGAQLSGGQKQRIAIARALIREPKILLLDEATSALDTTSEAEVQAALD  | 588 |
| Dpon_c4796B     | 514 | GERGSQLSGGQKQRIAIARALIKAPNLLILDEATSALDTASEVEVQAALD  | 563 |
| CpABC6          | 514 | GERGGQLSGGQKQKLAIRALIRPQILLLDEATSALDTSESEVQAALD     | 563 |
| Dvv-isotigl1596 | 514 | GERGTQLSGGQKQKIAIRALVTRPEFLLLDEATSALDTTSEAEIQEALD   | 563 |
| CpABC10         | 525 | GERGAQLSGGQKQRIAIARALVRKPEILLLDEATSALDTTSEAEVQAALD  | 574 |
| TcABCB-3B       | 533 | GERGAQLSGGQKQRIAIARALVRNPAILLLDEATSALDTNSEAKVQAALD  | 582 |
| Dpon_c80822     | 523 | GERGAQLSGGQKQRIAIARALVRNPAILLLDEATSALDTNSEAKVQAALD  | 572 |
| Dpon_c4796A     | 528 | GERGAQLSGGQKQRIAIARALVRNPAILLLDEATSALDTNSEAKVQAALD  | 577 |
| Dpon_c306       | 516 | GERGAQLSGGQKQRIAIARALVRNPAILLLDEATSALDTNSEAKVQAALD  | 565 |
| Dvv-isotigl1620 | 526 | GEKGAQLSGGQKQRIAIARALVRNPATLLLLDEATSALDNTSEAKVQAALD | 575 |
| Dvv-isotig07787 | 526 | GERGTQLSGGQKQRIAIARALVRKPTLLLLDEATSALDNASEAKVQEALD  | 575 |
| CRW424          |     | GERGTQLSGGQKQRIAIARALVRKPTLLLLD                     |     |
| CpABC12         | 528 | GERGAQLSGGQKQRIAIARALVRKPTILLLDEATSALDNNSEAKVQAALD  | 577 |
| Ct-ABCB1        | 528 | GERGAQLSGGQKQRIAIARALVRKPSILLLDEATSALDNNSEAKVQAALD  | 577 |
|                 |     | ** . * * * * * . * * * * . * * * * * . * * * *      |     |

|                 |     |                                                     |     |
|-----------------|-----|-----------------------------------------------------|-----|
| TcABCB-3A       | 589 | AVSGECTTIIIVAHRLSTIRNANRIVVSHGVSIEEGTHSELMAKKGAYFD  | 638 |
| Dpon_c4796B     | 564 | AISGECTKLIVAHRLSTIRNATRIIVFDQGEVVEHGSHAQDMAAKGYVYN  | 613 |
| CpABC6          | 564 | SISGECTTIIIVAHRLSTIRNAKKIVYIIEGRVSEIGSHAELMAKKGAYFK | 613 |
| Dvv-isotig11596 | 564 | SIRGTCTIIIVAHRLSTIRQASKIVVINEGKVLEMGTHTELMMDMKGAYHN | 613 |
| CpABC10         | 575 | SVSGECTTIIIVAHRLSTIRNANRIVVISAGKVQEIGSHAELMAKEGGYYN | 624 |
| TcABCB-3B       | 583 | KASKGCTTVIVAHRLSTIRNANKIVVISGKVVEQGTNHELMELKSEYYN   | 632 |
| Dpon_c80822     | 573 | KASQNRCTIIIVAHRLTIRGANKIVVISEGKVVEEGTHHELMKLQREYYT  | 622 |
| Dpon_c4796A     | 578 | RASENRCTIIIVAHRLSTIRGANKIVVISDGKVVEQGTNHELMELKKEYYT | 627 |
| Dpon_c306       | 566 | RASEHRTTIIIVAHRLSTIRGANKIVVISDGKVVEQGTNHELMELKNEYA  | 615 |
| Dvv-isotig11620 | 576 | AASVECTTIIIVAHRLSTIRGANKIIVLSQGVVVEEGTHEELMELKQEYYR | 625 |
| Dvv-isotig07787 | 576 | LASAECTTIIIVAHRLSTIRGANKIIVLLEGTVVEQGTNHELMELKGEYFK | 625 |
| CpABC12         | 578 | SASVDCTTVIVAHRLSTIQGANKIMVFSKGAVVEQGTNHELMALKKEYYN  | 627 |
| Ct-ABCB1        | 578 | SASVDCTTVIVAHRLSTIQGANKIMVFSKGAVVEQGTNHELMALKNEYN   | 627 |
|                 |     | * ..*****.*. * .*. * * * .*. * *                    |     |
| TcABCB-3A       | 639 | LVQSQGLVETEETT--TEEKQKQNGVVDTKPNQTEVTEIISTENLNDQA   | 686 |
| Dpon_c4796B     | 614 | MITSQGYTDLKSENDKDNKALQKSKSFSNHSRESAEDDQVTEEEYFPQ    | 663 |
| CpABC6          | 614 | LVNSQGLMDTKPFS---QIQKIMRQVSSPMHQFVTDREDENVDEKSNDTQ  | 660 |
| Dvv-isotig11596 | 614 | LVISQGLTETLEEK---GNRRSRKFSEANKS-INEKEDEELEDTQINQP   | 659 |
| CpABC10         | 625 | LVKSQGFTEQETT---GDRRLSRFSLSNKSCEVEDEEEKIDEAEES      | 671 |
| TcABCB-3B       | 633 | LVMTQVSAVEKFDGDQEGESRKLVELER-QVSLLDDEKHDDAEVEVQEA-  | 680 |
| Dpon_c80822     | 623 | LVTQVQSGSQFESSTNEESKTEVAAAEDDEDEALSDKVEDEEAETDNY-   | 671 |
| Dpon_c4796A     | 628 | LVTQVQSGSEKFENIGETKEKKILDYAEDDDEDFAPKKEIDEEAEVDNY-  | 676 |
| Dpon_c306       | 616 | LVTQVHSSEQFENIGEASEKKIFDSVEDDDEDFAPKRETEESEVDNY-    | 664 |
| Dvv-isotig11620 | 626 | LVTQVKSSEQFEVAEKKKVVRAISLAESSTGSD-HNIEATKEDNEDDFN   | 674 |
| Dvv-isotig07787 | 626 | LVTQVASSNQIELSNDETETKGNNEAYEYNDDDDDISDEKNEIDDFK     | 675 |
| CpABC12         | 628 | LVTQVKSKETVTQYTKSDKTQEHEDVIDEVVP--VEAAFAAEDDDEDFV   | 675 |
| Ct-ABCB1        | 628 | LVTQVKSKETVTQYKSDKTQYEDDDIDEVVP--VEASFAAEDDDEDFV    | 675 |
|                 |     | .. *                                                |     |
| TcABCB-3A       | 687 | ENKGPILQILKMNKPEWFHIFTGCVTAVINGSAPFIYGLVFGDIIGVLA   | 736 |
| Dpon_c4796B     | 664 | EGSSRTILKILRMNSSEWLSMIIIGTLASFNGASLPYGLIFGDILGALS   | 713 |
| CpABC6          | 661 | VDKI--FIKVMKMCKPEWYLIAIGCVSSVIKGVAYPINGWIFGSIIGILF  | 708 |
| Dvv-isotig11596 | 660 | VAKN-ILWKVLKLNASEWFYILIGCLSSLITGASLPYGLVFGGIMGIFA   | 708 |
| CpABC10         | 672 | VESKGVVLKVIKMNKPEWFYFNGICLCGLTGASLPVYGLVFGGIVGVLA   | 721 |
| TcABCB-3B       | 681 | -ERSVSLMSILRMNKPEWVSISIGCIASIVMGCSMPAFVIFGDIIMVLA   | 729 |
| Dpon_c80822     | 672 | -VKKASIWSISKLNAPWYLIIVLCVGAAMGTSMPFFAVLFGNITVLQ     | 720 |
| Dpon_c4796A     | 677 | -VKTASLWSIVKLNSPEWLSLVLCIGAGAMGTAFPIFAILFGNITVLQ    | 725 |
| Dpon_c306       | 665 | -VKTASLWSIVKLNSPEWLSLVLCGFGAAMGTVLPPIFAVLLGSILOVLQ  | 713 |
| Dvv-isotig11620 | 675 | ENKDVSVFEILKMNAPWYIILFAGLGSIVVCGMPVFAVLFSGIIGTLA    | 724 |
| Dvv-isotig07787 | 676 | NGKKITLFSIMKLNAPWYIILAGVGSIVVGWGWPIFAVFFGSVLGTLA    | 725 |
| CpABC12         | 676 | SDRNMRLIDVIKMNAPWYIIVVASIGSTVIGCAMPIFSIVLFGSIIGTLA  | 725 |
| Ct-ABCB1        | 676 | SDRNMRLIDVIKMNAPWYIIVVASIGSTVIGCAMPIFSIVLFGSIIGTLA  | 725 |
|                 |     | . . . * * . * * * * . .                             |     |
| TcABCB-3A       | 737 | DPRDS--YVREQSNIFSLYFVIIIGIVTAVATFLQIYYFAVAGEKLTKRIR | 784 |
| Dpon_c4796B     | 714 | IIDNT--VLRREANFYCLYFLYLGASGIAMFFQIYGFYAGEKLTYYLR    | 761 |
| CpABC6          | 709 | LEEDD--ELLSENNTLCYFICLAFIIGGSTFFQLTTFGIAGEKLTYYLR   | 756 |
| Dvv-isotig11596 | 709 | NDNDG--EVRSESNMYCLYFLILGVVTGVAMFWQTTSFSVAGEHLTLKIR  | 756 |
| CpABC10         | 722 | LTDD--SVRRESNLYCLYFLILGIVTGIAAMFFQMFSGIAGEKLTYYLR   | 769 |
| TcABCB-3B       | 730 | EKNED--EVISETNRFYFVIAGVVGSIATFLQIFMFSVAGEKLTYYLR    | 777 |
| Dpon_c80822     | 721 | STDEE--YVRTQTNKYCLYFVYAGLMSMVATFMQYMFGRAGQKLTYYLR   | 768 |
| Dpon_c4796A     | 726 | DIDSNPDYVRQETNKYCLYFVLAVLSMCATFLQYMFGRAGQKLTYYLR    | 775 |
| Dpon_c306       | 714 | DSDKN--YVRQETNKYIILYFVLAVLAFATFLQYMFGRAGENLTYYLR    | 761 |
| Dvv-isotig11620 | 725 | NGDPD--FVRSETNKYCLYFVLGGLITMVSVFTQMYLLGIAGEKMTERR   | 772 |
| Dvv-isotig07787 | 726 | KYDTE--YIETETTRYCFFVIAGVICMISVFLQNYLLGIAGEKMTERR    | 773 |
| CpABC12         | 726 | DSKTE--YVRSETNKYVYFVIAGAVAMVSFVLQYMFGIAGEKMTERR     | 773 |
| Ct-ABCB1        | 726 | NSDTE--YVRTETNKYVYFVIAGAVAMVSFVLQYMFGIAGEKMTERR     | 773 |
|                 |     | . . . .*. * * **.* *                                |     |

|                 |     |                                                      |     |
|-----------------|-----|------------------------------------------------------|-----|
| TcABCB-3A       | 785 | AKMFRAMLNQEMAWFDRKENGVGALCAKLSGEAASVQAGGIRIGTVLNS    | 834 |
| Dpon_c4796B     | 762 | NKMFGCMLRQEMGWDFDRKENGVGALCAQLSGDAASVQAGGSRIGLILNS   | 811 |
| CpABC6          | 757 | LNTFRAILRQEMGWDFDRKENGVGALCARLASDANNIQGLAGLHIGTVLNT  | 806 |
| Dvv-isotig11596 | 757 | SKTFEAMLRQEIGWYDQKSNVGALCARLAGDAVAVQGAAGPQIGTTINF    | 806 |
| CpABC10         | 770 | HKTFEAMMNQEMGWDFDKKENGVGALCAQLAGDAAAIQGVAVQIGTVLNF   | 819 |
| TcABCB-3B       | 778 | SMTFIAMLKQEMGWYDRKDNVGALCARLSGEAAHVQGATGQRVGTILQS    | 827 |
| Dpon_c80822     | 769 | SRMFEALLKQEMAYYDRKSNVGSLCAKLSDEAASVQGATGQRIQSIMSS    | 818 |
| Dpon_c4796A     | 776 | SRMFDALLKQEMGYFDRKENGVSGLCAKLSNEAAVQGATGQRIQIVNS     | 825 |
| Dpon_c306       | 762 | SRMFDALLKQEMGYFDRNENGVSGLCAKLSNEASVQGATGQRIQIVNS     | 811 |
| Dvv-isotig11620 | 773 | SRLFKAMIYQEIGFFDKKTNGVGALCAKLSSDASNIQGATGIRVGTILQS   | 822 |
| Dvv-isotig07787 | 774 | TQMFTAIISQEMGFFDKKSNVGALCAKLAGDSSSIQGATGQRVGAILQS    | 823 |
| CpABC12         | 774 | GKMFSAMLNQEIGFFDKKSNVGALCAKLSSDAASVQGATGQRIQIVLQS    | 823 |
| Ct-ABCB1        | 774 | GKMFSAMLNQEIGFFDKKTNGVGALCAKLSSDAASVQGATGQRVGVVLQS   | 823 |
|                 |     | * . . . * . . . * . . . * . . . * . . . * . . .      |     |
| TcABCB-3A       | 835 | LATFIISNIIALYFEWRLALVLISFSPILLVSVFFEQKFTQGDSQVQNQKY  | 884 |
| Dpon_c4796B     | 812 | VSTFILAACIGFYLEWRLTLVAGVFFPLMFFSISYERKSVQKETQAAQKL   | 861 |
| CpABC6          | 807 | LTTFTVTLVFCFYEWKLTVLVIAIFPLIFLSVYLEQKFLQDDIIKNQLM    | 856 |
| Dvv-isotig11596 | 807 | ISTFILTCTFSFYEWRTSFVFLSFCPVIFFSVYFEQKVLQEDATKNQKM    | 856 |
| CpABC10         | 820 | LCTFILTCAFSFYEWKLTVLVLSFCPLIFFSVYFEQKSMQNDAIKNQKM    | 869 |
| TcABCB-3B       | 828 | IATIGLSVGLSMYYQWKLGLVALAFTPFILLAVFFQHRMLMNVENEHHKS   | 877 |
| Dpon_c80822     | 819 | LSTLAFALFLALFYQWRLGLVALSFFPLILISTFFQRRQMSQESDEYRAS   | 868 |
| Dpon_c4796A     | 826 | LATLSLVFLAVYEWRLGLVAMVFPVPLIIVATFLQRRQMSQESDDYKES    | 875 |
| Dpon_c306       | 812 | LATLILSVFFAVYEWRLGLVAMVFPVPLIIAATFIQKKQMSQESDDYKES   | 861 |
| Dvv-isotig11620 | 823 | IATFCLAIGLSMYEWKLGVTAAFTPVILIAMFFERRNTRGGNDSRDSA     | 872 |
| Dvv-isotig07787 | 824 | LSTFGIAIALSMYYQWKLGLLMASTPLMLVAIFIEKRNITGLSEAREKS    | 873 |
| CpABC12         | 824 | MATFCLAVGLAMYYEYRLGLVTVAFMPFLLIAFFERRNSSGQNDTRDKA    | 873 |
| Ct-ABCB1        | 824 | MATFCLAVGLAMYYEYRLGLVTVAFMPFLLIAFFERRNSSGQNDTRDQS    | 873 |
|                 |     | ..* . . . . * . . . .                                |     |
| TcABCB-3A       | 885 | LENSAKIAVEAIGNIRTIASLGCEEVFGHYVVKELTPYVANV-KKQMHFR   | 933 |
| Dpon_c4796B     | 862 | LEKSAKIAIEAIDNIKTVALGCERVFCDTYEKELDLCRQAG-FKRSHIK    | 910 |
| CpABC6          | 857 | LEKSSKLAIEAIGNIRTVVSLGCEQVFLDLFVKELLPYRAMA-NRKSHMR   | 905 |
| Dvv-isotig11596 | 857 | LEASAKLAVEAIGNIRTVVSLGCEKVFMEQYIKELLPYQKMA-RKSHYR    | 905 |
| CpABC10         | 870 | VERSSKLAVEAIGNIRTVVSLGCERVFDHMYVKELSPYQALA-RRKSHFR   | 918 |
| TcABCB-3B       | 878 | LQKSNKLAVEAVGNIRTVVSLGLEETFHKLIIISYLMHHKRT-LRNTHFR   | 926 |
| Dpon_c80822     | 869 | LQKSTKIAVEAVGSIRTVVSLGCEDIFYNLYISELMPHIKTC-LRNTHGR   | 917 |
| Dpon_c4796A     | 876 | LQKSTKIAVEAVGSIRTVVSLGCETFLNLYINELTPHIKKC-LRNTHAR    | 924 |
| Dpon_c306       | 862 | LEKSTKIAVEAVGSIRTVVSLGCEKTFKLYISELMPHIKKC-LRNTHAR    | 910 |
| Dvv-isotig11620 | 873 | LQKSTRTAVEAVGNIRTVASLGLEEKFQQLYESELMPHYKSS-LKTVHWR   | 921 |
| Dvv-isotig07787 | 874 | LQKSTKIAVEAVGNIRTVAGLVAEDKFQKSYITELKPHYKAA-LAAVHWR   | 922 |
| CpABC12         | 874 | LQKSTKIAVEGVGNIRTVASLGLEEKFHHLIYISELMPHYKNSNRASLHWR  | 923 |
| Ct-ABCB1        | 874 | LQKSTKIAVEGVGNIRTVASLGLEEKFHHLIYISELLPHYKNSSSASLHWR  | 923 |
|                 |     | ..* . * . . * . * . * . * .                          |     |
| TcABCB-3A       | 934 | SAVLGVARSVMLFAYAVGMGYGAKLMVDSVDVYGTVFIVSETVIVGSWSI   | 983 |
| Dpon_c4796B     | 911 | AGLIGMARCIQFLAYAGGMTYGAQLLEQNEVDSATLFKVLEIVTSSWSI    | 960 |
| CpABC6          | 906 | GLILGMARALMIASLAGIMYGGKIIIDGEAEYGTVFVKCEIMTMGSWAI    | 955 |
| Dvv-isotig11596 | 906 | GIIVGLARSLMLFAYVAGIRYGINLIISGDCPYGTIFIVCEVMIVGTWSV   | 955 |
| CpABC10         | 919 | GTVLGMARSLIVFAYAAGMGYGIKLIIDGAVEYGVIVKVCVMIVGSWSI    | 968 |
| TcABCB-3B       | 927 | AVVLGLARSIMFFAYSACMYGGHLIRDEGLLYQDVFKVSQSLIMGTVSI    | 976 |
| Dpon_c80822     | 918 | ALVLAFSRAILLFAISACLYYGGHLIRDGQVEFGDVFKVTQGLVMGTISI   | 967 |
| Dpon_c4796A     | 925 | AFILGFSRAIMIFAFSACLIVYGGYLIKNDNVQYGDVFKVAQALIMGTVSI  | 974 |
| Dpon_c306       | 911 | AFILGFSRAIMIFAFSACLIVYGGYLIKHNQYGVVFKVAQALIMGTVSI    | 960 |
| Dvv-isotig11620 | 922 | AIVFGLSRSLFFAYATAMYYGGFLIR-DGLPYDRVFKVSQAQIMGTVSI    | 970 |
| Dvv-isotig07787 | 923 | GLVFGLSRSLGYFAYAAAMYYGGFLIR-DGLYYDKVFKVAQALIMGTISI   | 971 |
| CpABC12         | 924 | GIVFGLSRGLSFFAYSAAAMYYGGYLIKNDNLSYEKVFVKVSQAQIMGTISI | 973 |
| Ct-ABCB1        | 924 | GIVFGLSRGLSFFAYSAAAMYYGGYLIKNDNLSYEKVFVKVSQAQIMGTISI | 973 |
|                 |     | . . * . . . * . . . . * . . . .                      |     |

|                 |      |                                                       |      |
|-----------------|------|-------------------------------------------------------|------|
| TcABC-3A        | 284  | GNALSFSPNFQKGLSADIRIFSLLRKVPVKNKSLPVLNDVRGNIYSN       | 1033 |
| Dpon_c4796B     | 961  | GNALSFSSNMQKGITAAAKIFRLNREPAIKNSPNGIVRYLEKADVEYSK     | 1010 |
| CpABC6          | 956  | GNALALPPNFQQAALNAAARTISLLERKPSVKTTGNP----WRDGNVEYND   | 1001 |
| Dvv-isotig11596 | 956  | GNALSLSPNFQKGLVAAASRIITLLERQPVVQNMMPDALFWEDENVEYS     | 1005 |
| CpABC10         | 969  | GNAMSMTPNFQKGLIAARRISLLDRTPLVKNIANPSKKLWENENIEFSQ     | 1018 |
| TcABC-3B        | 977  | ANALAFTPNLQKGLVAAARIIRLLRRQPLRDEPGAADKEWENGAIQYDT     | 1026 |
| Dpon_c80822     | 968  | ANSLAFTPNLEKGLIAAKSVMTNINRIQIRNLPDAKNKTQAEGDLGYSD     | 1017 |
| Dpon_c4796A     | 975  | ANSLAFTPNLEKGLVAARTVMNMINRIPKVSNSQNALIKKTADGNVDYSQ    | 1024 |
| Dpon_c306       | 961  | ANSLAFTPNFEKGLVAARTVMNMINRIPKVSNSQNALIKKTADGNVYSQ     | 1010 |
| Dvv-isotig11620 | 971  | ANSLAFSPNFAKGVAIAAKVKVSFLSRIPRLIRDLPSRQPMVKASGNFSFSE  | 1021 |
| Dvv-isotig07787 | 972  | ANSLAFTPNLRGISAARKIKSFLSRIPRLIRDPSPKPMQVQDGNIGYSN     | 1021 |
| CpABC12         | 974  | ANSLAFTPNFTKGLSAAKSVQKFLERVPIKIRDDMNSKDVNEVEGDISFSK   | 1023 |
| Ct-ABCBl        | 974  | ANSLAFTPNFTKGLNAAKSVQKFLERPMPKIRDDMNSKDVNEVEGDISFAK   | 1023 |
|                 |      | * . . * . . . *                                       |      |
| TcABC-3A        | 1034 | IYFSYPTRRSSVSVLNLGNLNLVQKKTVALVGASGCGKSTIIQLLERFYDP   | 1083 |
| Dpon_c4796B     | 1011 | IYFSYPTRPAIPILNGLDLSILNGKTVALVGGSGCGKSTLIQLLIRFYDP    | 1060 |
| CpABC6          | 1002 | IFFSYPTRPSISVLNGLDLRVMQKKTVALVGGSGCGKSTVVQLLIRFYDP    | 1051 |
| Dvv-isotig11596 | 1006 | VYFSYPTRPSIPILKALNLLIPKGTVALVGGSGCGKSTIIQLLERFYDP     | 1055 |
| CpABC10         | 1019 | IYFSYPTRPSISILNLSNLSILKGTVALVGGSGCGKSTIIQLLERFYDP     | 1068 |
| TcABC-3B        | 1027 | IYFSYPTRPNIMVLKGLNLSVLQKKTVALVGPSPGCGKSTIIQLIERFYDP   | 1076 |
| Dpon_c80822     | 1018 | VHFSYPTRPKIFVLRGLDLSVLRGKTVALVGPSPGCGKSTIQLIERFYDP    | 1067 |
| Dpon_c4796A     | 1025 | IRFAYPTRDSIQVLKGLDLSVLQKKTVALVGPSPGCGKSTIIQLLERFYDP   | 1074 |
| Dpon_c306       | 1011 | IHFSYPTRDSIEVLKGLDLSVLQKKTVALVGPSPGCGKSTIIHLIERFYDP   | 1060 |
| Dvv-isotig11620 | 1021 | IEFTYPTRPNVILKGLNLDILNGKTVALVGGSGCGKSTIIQLIERFYDP     | 1070 |
| Dvv-isotig07787 | 1022 | VEFFYPTRKNIQVRLGTLINIPKGSTVALVGESGCGKSTIIQLIERFYDP    | 1071 |
| CpABC12         | 1024 | IKFAYPTRPGTMVLRDLDLKIFKGTVALVQSGCGKSTLIQLIERFYDP      | 1073 |
| Ct-ABCBl        | 1024 | IKFAYPTRPGTTVLRDLDLRIFKGTVALVQSGCGKSTLIQLIERFYDP      | 1073 |
|                 |      | * * **** * * . . * ***** ***** . . . *                |      |
| TcABC-3A        | 1084 | VSGEVSLDGESVKTVDIQNLRSHLGLIVSQEPNLFDRRTIAENIAYGAND-R  | 1132 |
| Dpon_c4796B     | 1061 | GYGEVAIGGDDVRALSKLHLSHLGLIVSQEPNLFDLRTIAENISYGHDR-R   | 1109 |
| CpABC6          | 1052 | AGGATVVDGVDTRSMRLGQLRSQGLIVSQEPNLFDRRTIAENISYGAVER-R  | 1101 |
| Dvv-isotig11596 | 1056 | SYKGVEISDKNIRYVDLSQLRSQGLIVSQEPNLFDRRTIAENIAYGAN-K    | 1104 |
| CpABC10         | 1069 | DYGGITVDGEDTTKTDMATMRSQLGLIVSQEPNLFDRRTIAENISYGANQ-K  | 1117 |
| TcABC-3B        | 1077 | LEGLTVTDNEDIRNIRLGSRLSHLGLIVSQEPNLFDRRTIGDNIAYGDN-R   | 1125 |
| Dpon_c80822     | 1068 | LSGSVTLDRGDLKSLTLSSRLSHLGLIVSQEPNLFDRRTIAENIAYGDNA-R  | 1116 |
| Dpon_c4796A     | 1075 | ASGTVSLDKDDIKSITLASRLSHLGLIVSQEPNLFDRRTIAENIAYGDN-R   | 1123 |
| Dpon_c306       | 1061 | ASGTVSLDEDDIKSITLASRLSHLGLIVSQEPNLFDRRTIAENIAYGDN-R   | 1109 |
| Dvv-isotig11620 | 1071 | RSGEVKMDGVDLKDIDLSDLSRLSHMGLIVSQEPNLFNKSIAENIAYGDN-R  | 1119 |
| Dvv-isotig07787 | 1072 | SSGDINLDEQNIKHITLSSRLSHLGLIVSQEPNLFNKSIAENIAYGDN-R    | 1120 |
| CpABC12         | 1074 | SEGEVMLDEINVKRMRLSSRLSHLGLIVSQEPNLFNKTIRENISYDNG-R    | 1122 |
| Ct-ABCBl        | 1074 | TGGEVMLDDIDVCRMRLSRLSHLGLIVSQEPNLFNKTIRENISYDNG-R     | 1122 |
|                 |      | * . . . * . . . . . *                                 |      |
| TcABC-3A        | 1133 | TVGMNEIVEAASANIHTFISLPGGYETSLGSKGAQLSGGQKQRIAIAIAR    | 1182 |
| Dpon_c4796B     | 1110 | KVDLKEIMEAASANVHSFVTSPLPGYETRLGSKGQLSGGQKQRIAIAIAR    | 1159 |
| CpABC6          | 1102 | DARIDRIMEAASANIHTFISLPMGYDTRVGTNGTQLSGGQKQRIAIAIAR    | 1151 |
| Dvv-isotig11596 | 1105 | QVEMDAIIDAASANIHEFILNPKGYETKVGSGTQLSGGQKQRIAIAIAR     | 1154 |
| CpABC10         | 1118 | QVEDMEKVMESAASANIHNFTALPMGYETRIGNGTQLSGGQKQRIAIAIAR   | 1167 |
| TcABC-3B        | 1126 | EVTQEEIIEAANKNANIHNFIASLPLGYETRLGEKGTQLSGGQKQRIAIAIAR | 1175 |
| Dpon_c80822     | 1117 | TVPMAEIIEAATKANIHFTITGLPKGYDTKLGDGKTQLSGGQKQRIAIAIAR  | 1166 |
| Dpon_c4796A     | 1124 | QATEVEIIEAARKNANIHNFIHLPLPKGYTKLGEKGTQLSGGQKQRIAIAIAR | 1173 |
| Dpon_c306       | 1110 | HTSDSEIIEAARKNANIHNFTGLPEGYNTKLGEKGTQLSGGQKQRIAIAIAR  | 1159 |
| Dvv-isotig11620 | 1120 | EVSMDIEIIEAANKNANIHNFTQLPKGYETKLGEKAVQLSGGQKQRIAIAIAR | 1169 |
| Dvv-isotig07787 | 1121 | NVPIDEIIEAANKNANIHNFTIVGLPNGYDTLGEKATQLSGGQKQRIAIAIAR | 1170 |
| CpABC12         | 1123 | VVQMDDEVIAAVNANIHNFTISGLPKGYETSLGEKAVQLSGGQKQRIAIAIAR | 1172 |
| Ct-ABCBl        | 1123 | VVQMDDEVIAAVNANIHNFTISGLPKGYETTLGEKAVQLSGGQKQRIAIAIAR | 1172 |
|                 |      | * * * * * * * * * * * *                               |      |

|                                    |      |                                                     |      |
|------------------------------------|------|-----------------------------------------------------|------|
| TcABCB-3A                          | 1183 | ALIRNPKILLLLDEATSALDNESEKVVQEALDNAKKNRTCITIAHRLTTIQ | 1232 |
| Dpon_c4796B                        | 1160 | ALLRDPKILLLLDEATSALDNESEKIVQEALDNARKGRTCITIAHRLTTIQ | 1209 |
| CpABC6                             | 1152 | ALMRNPKILLLLDEATSALDNESEKIVQQALEVARKGRTCITIAHRLTTIQ | 1201 |
| Dvv-isotig11596                    | 1155 | ALLRNPKILLLLDEATSALDNESEKIVQEALDNARKSRTCITIAHRLTTIQ | 1204 |
| CpABC10                            | 1168 | ALMRNPKILLLLDEATSALDNESEKIVQEALDNARQGRTCITIAHRLTTIQ | 1217 |
| TcABCB-3B                          | 1176 | ALVRNPKILLLLDEATSALDSESEKVVQEALDNAKKGRTCITIAHRLTTIQ | 1225 |
| Dpon_c80822                        | 1167 | ALVRNPKVLLLDDEATSALDAESEKVVQEALDNAKQGRTCLTIAHRLTTIQ | 1216 |
| Dpon_c4796A                        | 1174 | ALIRQPKVLLLDDEATSALDAESEKVVQEALDNAKQGRTCLTIAHRLTTIQ | 1223 |
| Dpon_c306                          | 1160 | ALIRHPKVLLLDDEATSALDAESEKVVQDALDNAKQGRTCLTIAHRLTTIQ | 1209 |
| Dvv-isotig11620                    | 1170 | ALVRNPKVLLLDDEATSALDTESEKVVQEALDQAKKGRTCVTIAHRLTTIQ | 1219 |
| Dvv-isotig07787                    | 1171 | ALVQNPKILLLLDEATSALDTESEKVVQAALDEAKKGRTCITIAHRLTTIQ | 1220 |
| CpABC12                            | 1173 | ALVRNPKVLLLDDEATSALDTESEKIVQEALDQAKMGRTCITIAHRLSTIQ | 1222 |
| Ct-ABCB1                           | 1173 | ALVRNPKVLLLDDEATSALDTESEKVVQEALDQAKLGRTCITIAHRLSTIQ | 1222 |
| **..*.***** ***.**.*.***.*****.*** |      |                                                     |      |
| TcABCB-3A                          | 1233 | DADLICVLNEGVAEMGKHNELLDKKGLYYDFYKLQTGQK             | 1272 |
| Dpon_c4796B                        | 1210 | DADVIVVKEGQIAEMGTHGELLKLKGHYDYKMQSGQN               | 1249 |
| CpABC6                             | 1202 | DADLICVLEKGMVAEMGDHQTLLQRRGLYYEFYKLQTCQ             | 1240 |
| Dvv-isotig11596                    | 1205 | DADVIVLKEGNVEMGTHKELLEKQGLYYKFYKLQSVESIS            | 1246 |
| CpABC10                            | 1218 | DADVIVLKEGFAEMGTHTELLIKRGMYYKFYKLQAGQT              | 1257 |
| TcABCB-3B                          | 1226 | DADVIVIDKGVVAEIGTHSELLSQKGLYYKLHSLQNK               | 1263 |
| Dpon_c80822                        | 1217 | DADVIVVNEGVAEQGTHSELIEKKGLYYKLHALQH                 | 1253 |
| Dpon_c4796A                        | 1224 | DADLICVNDGVIVEQGNHTDLIERKGLYYRLHAHQH                | 1260 |
| Dpon_c306                          | 1210 | DADLICVNVNGVIVEQGAHTDLIERNGLYYRLYARQHYFL            | 1249 |
| Dvv-isotig11620                    | 1220 | DADLICVANGVIAESGSHQELLQKEGLYYKLYTQKT                | 1256 |
| Dvv-isotig07787                    | 1221 | DADIIYVIDKGIVVESGTHRELLNKNGFYYKLYTQKH               | 1257 |
| CpABC12                            | 1223 | DADMICVIDRGIVAEAGTHAELEKKGLYYKLQRQAT                | 1259 |
| Ct-ABCB1                           | 1223 | DADMICVIDRGIVAEAGTHAELEKKGLYYKLQRQTT                | 125  |

**Figure S5.** CLUSTAL Alignment of ABCB protein sequences from Coleoptera. CRW424: Chromosome 8 marker linked to Cry3Bb resistance in *Diabrotica virgifera virgifera* (Ref. [17]). Other abbreviations as in Figure S4. \* The asterisks denote identical amino acids and the dots denote conserved amino acids.
